# Supplementary material for: Risk factor assessments of temporomandibular disorders via machine learning
Source: PubMed Central journal article supplement (PMC8492627; doi:10.1038/s41598-021-98837-5), 2021-10-05
Supplement: 41598_2021_98837_MOESM1_ESM.pdf [file 41598_2021_98837_MOESM1_ESM.pdf]

Appendix Table 1. Descriptive statistics—categorical variables

| Variable                      | Count | Percentage |
|-------------------------------|-------|------------|
| TMD (Self-Reported)           |       |            |
| No                            | 4643  | 97.9       |
| Yes                           | 101   | 2.1        |
| TMD (Diagnosed by Doctor)     |       |            |
| No                            | 4676  | 98.6       |
| Yes                           | 68    | 1.4        |
| Sex (Female)                  |       |            |
| No                            | 2479  | 52.3       |
| Yes                           | 2265  | 47.7       |
| Region: Metropolitan          |       |            |
| No                            | 2735  | 57.7       |
| Yes                           | 2009  | 42.3       |
| Region: Rural                 |       |            |
| No                            | 3395  | 71.6       |
| Yes                           | 1349  | 28.4       |
| Residence Type: Apartment     |       |            |
| No                            | 2912  | 61.4       |
| Yes                           | 1832  | 38.6       |
| Household Income - Subjective |       |            |
| Q1                            | 1139  | 24.0       |
| Q2                            | 1216  | 25.6       |
| Q3                            | 1195  | 25.2       |
| Q4                            | 1194  | 25.2       |
| Education                     |       |            |
| Elementary school and below   | 1034  | 21.8       |
| Junior High                   | 543   | 11.4       |
| Senior High                   | 1755  | 37.0       |
| College and above             | 1412  | 29.8       |
| Occupation                    |       |            |
| Unemployed                    | 435   | 9.2        |
| Agriculture                   | 632   | 13.3       |
| Manufacturing                 | 693   | 14.6       |
| Service                       | 2984  | 62.9       |
| Marital status                |       |            |
| Married                       | 3450  | 72.7       |
| Separated                     | 63    | 1.3        |
| Widowed                       | 217   | 4.6        |
| Divorced                      | 169   | 3.6        |
| Unmarried                     | 845   | 17.8       |
| Health Insurance              |       |            |
| Medicare                      | 4654  | 98.1       |
| Medicaid                      | 90    | 1.9        |
| Stress                        |       |            |
| No                            | 3268  | 68.9       |

|                                |      |      |
|--------------------------------|------|------|
| Yes                            | 1476 | 31.1 |
| Suicidal Ideation              |      |      |
| No                             | 4038 | 85.1 |
| Yes                            | 706  | 14.9 |
| Working environment - Hygiene  |      |      |
| Very Poor                      | 151  | 3.2  |
| Poor                           | 839  | 17.7 |
| Good                           | 3023 | 63.7 |
| Very Good                      | 731  | 15.4 |
| Working environment - Risk     |      |      |
| Very Small                     | 1638 | 34.5 |
| Small                          | 1769 | 37.3 |
| Big                            | 1176 | 24.8 |
| Very Big                       | 161  | 3.4  |
| Working environment - Workload |      |      |
| Very Small                     | 674  | 14.2 |
| Small                          | 2170 | 45.7 |
| Big                            | 1633 | 34.4 |
| Very Big                       | 267  | 5.6  |
| Working environment - Control  |      |      |
| Very Poor                      | 236  | 5.0  |
| Poor                           | 1035 | 21.8 |
| Good                           | 2827 | 59.6 |
| Very Good                      | 646  | 13.6 |
| Working environment - Respect  |      |      |
| Very Poor                      | 52   | 1.1  |
| Poor                           | 396  | 8.3  |
| Good                           | 3825 | 80.6 |
| Very Good                      | 471  | 9.9  |
| Smoking status                 |      |      |
| No                             | 2473 | 52.1 |
| Yes                            | 2271 | 47.9 |
| Subjective Health              |      |      |
| Very Good                      | 245  | 5.2  |
| Good                           | 1892 | 39.9 |
| Middle                         | 1640 | 34.6 |
| Poor                           | 867  | 18.3 |
| Very Poor                      | 100  | 2.1  |
| Obesity - Subjective           |      |      |
| Very Thin                      | 164  | 3.5  |
| Thin                           | 620  | 13.1 |
| Middle                         | 1916 | 40.4 |
| Obese                          | 1635 | 34.5 |
| Very Obese                     | 409  | 8.6  |
| Drinking                       |      |      |
| No                             | 486  | 10.2 |
| Yes                            | 4258 | 89.8 |

|                        |      |      |
|------------------------|------|------|
| Hypertensive Disorders |      |      |
| No                     | 4017 | 84.7 |
| Yes                    | 727  | 15.3 |
| Rheumatoid Arthritis   |      |      |
| No                     | 4317 | 91.0 |
| Yes                    | 427  | 9.0  |
| Osteoarthritis         |      |      |
| No                     | 4369 | 92.1 |
| Yes                    | 375  | 7.9  |
| Osteoporosis           |      |      |
| No                     | 4534 | 95.6 |
| Yes                    | 210  | 4.4  |
| Lumbago                |      |      |
| No                     | 4094 | 86.3 |
| Yes                    | 650  | 13.7 |
| Sinusitis              |      |      |
| No                     | 4546 | 95.8 |
| Yes                    | 198  | 4.2  |
| Allergic Rhinitis      |      |      |
| No                     | 4249 | 89.6 |
| Yes                    | 495  | 10.4 |
| Mental Depression      |      |      |
| No                     | 4625 | 97.5 |
| Yes                    | 119  | 2.5  |
| Atopic Dermatitis      |      |      |
| No                     | 4609 | 97.2 |
| Yes                    | 135  | 2.8  |
| Diabetes Miletus       |      |      |
| No                     | 4495 | 94.8 |
| Yes                    | 249  | 5.2  |
| Thyroid Disorders      |      |      |
| No                     | 4628 | 97.6 |
| Yes                    | 116  | 2.4  |
| Otitis Media           |      |      |
| No                     | 4596 | 96.9 |
| Yes                    | 148  | 3.1  |
| Gastric/Duodenal Ulcer |      |      |
| No                     | 4464 | 94.1 |
| Yes                    | 280  | 5.9  |

---

Appendix Table 2. Logistic regression results: odds ratios, (\*\* P < 0.05, \* P < 0.10)

| Variable                      | Odds Ratio          |                           |
|-------------------------------|---------------------|---------------------------|
|                               | TMD (Self-Reported) | TMD (Diagnosed by Doctor) |
| Region (Metropolitan)         |                     |                           |
| No                            |                     |                           |
| Yes                           | 0.8768              | 0.5994                    |
| Region (Rural)                |                     |                           |
| No                            |                     |                           |
| Yes                           | 0.5937              | 0.4556                    |
| Residence Type (Apartment)    |                     |                           |
| No                            |                     |                           |
| Yes                           | 1.0156              | 0.8129                    |
| Sex (Female)                  |                     |                           |
| No                            |                     |                           |
| Yes                           | 1.4331              | 1.6001                    |
| Household Income - Subjective |                     |                           |
| Q1                            |                     |                           |
| Q2                            | 0.8553              | 0.5181                    |
| Q3                            | 0.4914              | 0.9861                    |
| Q4                            | 0.7129              | 0.7509                    |
| Education                     |                     |                           |
| Elementary, Below             |                     |                           |
| Junior High                   | 0.1853              | 0.1916                    |
| Senior High                   | 0.8176              | 0.8750                    |
| College, Above                | 0.8318              | 0.6471                    |
| Occupation                    |                     |                           |
| Unemployed                    |                     |                           |
| Agriculture                   | 1.5271              | 0.7145                    |
| Manufacturing                 | 0.6713              | 0.3899                    |
| Service                       | 0.7029              | 0.7169                    |
| Marriage                      |                     |                           |
| Married                       |                     |                           |
| Separated                     | <0.0001 **          | <0.0001 **                |
| Widowed                       | <0.0001 **          | <0.0001 **                |
| Divorced                      | 1.5424              | 0.6979                    |
| Unmarried                     | 0.7760              | 1.1188                    |
| Health Insurance              |                     |                           |
| Medicare                      |                     |                           |
| Medicaid                      | 0.8935              | <0.0001 **                |
| Working Condition - Hygiene   |                     |                           |
| Very Poor                     |                     |                           |
| Poor                          | 2.3751              | 1.4144                    |

|                              |           |             |    |
|------------------------------|-----------|-------------|----|
| Good                         | 2.0309    | 2.1618      |    |
| Very Good                    | 2.0930    | 2.1871      |    |
| Working Condition - Risk     |           |             |    |
| Very Small                   |           |             |    |
| Small                        | 0.8423    | 0.9052      |    |
| Big                          | 0.8673    | 1.1848      |    |
| Very Big                     | 0.7979    | 0.6837      |    |
| Working Condition - Workload |           |             |    |
| Very Small                   |           |             |    |
| Small                        | 2.5790 *  | 1.4827      |    |
| Big                          | 2.4328 *  | 1.0046      |    |
| Very Big                     | 1.9097    | 0.2952      |    |
| Working Condition - Control  |           |             |    |
| Very Poor                    |           |             |    |
| Poor                         | 0.7320    | 1.4098      |    |
| Good                         | 1.1890    | 1.0284      |    |
| Very Good                    | 2.1730    | 0.8682      |    |
| Working Condition - Respect  |           |             |    |
| Very Poor                    |           |             |    |
| Poor                         | 0.4805    | 91863.6100  | ** |
| Good                         | 0.5119    | 80734.4800  | ** |
| Very Good                    | 0.4652    | 154111.2000 | ** |
| Obesity - Subjective         |           |             |    |
| Very Thin                    |           |             |    |
| Thin                         | 1.2325    | 0.9955      |    |
| Middle                       | 0.5795    | 0.9627      |    |
| Obese                        | 0.4503    | 0.7050      |    |
| Very Obese                   | 0.2311    | 0.7879      |    |
| Drinking                     |           |             |    |
| No                           |           |             |    |
| Yes                          | 0.9198    | 0.7063      |    |
| Stress                       |           |             |    |
| No                           |           |             |    |
| Yes                          | 0.6401    | 1.9960      | ** |
| Suicidal Ideation            |           |             |    |
| No                           |           |             |    |
| Yes                          | 2.4388 ** | 2.2270      | ** |
| Smoking status               |           |             |    |
| No                           |           |             |    |
| Yes                          | 1.0162    | 1.2637      |    |
| Subjective Health            |           |             |    |
| Very Good                    |           |             |    |
| Good                         | 1.1045    | 1.8899      |    |
| Middle                       | 2.4454    | 3.1048      |    |

|                            |        |        |      |
|----------------------------|--------|--------|------|
| Poor                       | 1.9512 | 2.0326 |      |
| Very Poor                  | 2.4530 | 1.2925 |      |
| Hypertensive Disorders     |        |        |      |
| No                         |        |        |      |
| Yes                        | 0.6078 | 0.4607 |      |
| Rheumatoid Arthritis       |        |        |      |
| No                         |        |        |      |
| Yes                        | 2.9455 | 1.6877 |      |
| Osteoarthritis             |        |        |      |
| No                         |        |        |      |
| Yes                        | 0.1132 | 0.0000 |      |
| Osteoporosis               |        |        |      |
| No                         |        |        |      |
| Yes                        | 1.6133 | 0.9295 |      |
| Lumbago                    |        |        |      |
| No                         |        |        |      |
| Yes                        | 1.3984 | 2.4876 | **   |
| Sinusitis                  |        |        |      |
| No                         |        |        |      |
| Yes                        | 1.2305 | 1.3601 |      |
| Allergic Rhinitis          |        |        |      |
| No                         |        |        |      |
| Yes                        | 1.8412 | 1.7513 | *    |
| Mental Depression          |        |        |      |
| No                         |        |        |      |
| Yes                        | 1.6355 | 3.5054 | **   |
| Atopic Dermatitis          |        |        |      |
| No                         |        |        |      |
| Yes                        | 0.8443 | 0.4911 |      |
| Diabetes Miletus           |        |        |      |
| No                         |        |        |      |
| Yes                        | 1.4099 | 0.6900 |      |
| Thyroid Disorders          |        |        |      |
| No                         |        |        |      |
| Yes                        | 1.1854 | 3.2357 | *    |
| Otitis Media               |        |        |      |
| No                         |        |        |      |
| Yes                        | 1.2011 | 2.0550 |      |
| Gastric/Duodenal Ulcer     |        |        |      |
| No                         |        |        |      |
| Yes                        | 1.5726 | 1.5865 |      |
| Age                        | 0.9298 | 0.9620 | ** * |
| Household Income - Monthly | 1.0001 | 1.0008 |      |
| Body Mass Index            | 1.1031 | 1.1103 | *    |

Sleep - Daily

0.8934

0.8288

---
